# Supplementary material
Source: PubMed Central journal article supplement (PMC9835154)
Supplement: NIHMS1860785-supplement-Supplementary_Tables_1-3.pdf [file NIHMS1860785-supplement-Supplementary_Tables_1-3.pdf]

**Supplementary Table 1: Multivariate regression analysis of cytokine production by CD68<sup>+</sup>CD169<sup>-</sup> macrophages.**

| <b>Variable</b> <sup>a,b</sup>                                                                                                                                                                                                                                                   | <b>Regression Coefficient</b> | <b>SE</b>  | <b>T Stat</b> | <b>P-value</b> | <b>Anova F Significance</b> |
|----------------------------------------------------------------------------------------------------------------------------------------------------------------------------------------------------------------------------------------------------------------------------------|-------------------------------|------------|---------------|----------------|-----------------------------|
| <b>TNF-a</b>                                                                                                                                                                                                                                                                     |                               |            |               |                | 1.0746E-09                  |
| Particulate                                                                                                                                                                                                                                                                      | -11.465844                    | 2.4498021  | -4.6803143    | 1.2447E-05     |                             |
| age                                                                                                                                                                                                                                                                              | 0.39043518                    | 0.06778156 | 5.76019791    | 1.7456E-07     |                             |
| <b>IFN-a</b>                                                                                                                                                                                                                                                                     |                               |            |               |                | 7.594E-05                   |
| Particulate                                                                                                                                                                                                                                                                      | -14.330825                    | 4.14510033 | -3.4572928    | 0.00082798     |                             |
| age                                                                                                                                                                                                                                                                              | 0.39309388                    | 0.12571584 | 3.12684451    | 0.00236553     |                             |
| <b>IL-6</b>                                                                                                                                                                                                                                                                      |                               |            |               |                | 0.000618023                 |
| Particulate                                                                                                                                                                                                                                                                      | -17.290436                    | 4.75612431 | -3.6354046    | 0.00044251     |                             |
| age                                                                                                                                                                                                                                                                              | -0.2364667                    | 0.13912545 | -1.6996653    | 0.09233393     |                             |
| <b>Arg-1</b>                                                                                                                                                                                                                                                                     |                               |            |               |                | 0.1792245                   |
| Particulate                                                                                                                                                                                                                                                                      | -6.3761113                    | 4.45074987 | -1.4325926    | 0.15564186     |                             |
| age                                                                                                                                                                                                                                                                              | 0.16865373                    | 0.13975143 | 1.20681217    | 0.23085236     |                             |
| Abbreviations: SE, standard error; TNF-a, Tumor necrosis factor-alpha; IFN-a, interferon-alpha; IL-6, interleukin-6; Arg-1, Arginase-1                                                                                                                                           |                               |            |               |                |                             |
| a Frequency of TNF- $\alpha^+$ , IFN- $\alpha^+$ , Arg-1 <sup>+</sup> , and IL-6 <sup>+</sup> CD68 <sup>+</sup> CD169 <sup>-</sup> macrophages with or without black particulates analyzed with multivariate regression to identify particulate and/or age related effects.      |                               |            |               |                |                             |
| b TNF- $\alpha$ : Data are from 10 donors (3-4 single images for each donor); IFN- $\alpha$ : Data are from 15 donors (2-4 single images for each donor); IL-6: Data are from 14 donors (2-4 single images for each donor); Arg-1: 13 donors (2-4 single images for each donor). |                               |            |               |                |                             |

**Supplementary Table 2: List of antibodies.**

| <b>Antibodies</b>                                                                     |                |                 |
|---------------------------------------------------------------------------------------|----------------|-----------------|
| Brilliant Violet 421™ Rat anti-human IL-6 Antibody (clone: MQ2-13A5)                  | BD Biosciences | Cat#563279      |
| Brilliant Violet 421™ anti-human CD36 Antibody (clone: 5-271)                         | Biolegend      | Cat#336230      |
| PerCP/Cyanine5.5 anti-human CD36 Antibody (clone: 5-271)                              | Biolegend      | Cat#336224      |
| Alexa Fluor® 488 anti-human CD36 Antibody (clone: 5-271)                              | Biolegend      | Cat# 336231     |
| Alexa Fluor® 488 anti-human CD68 Antibody (clone: Y1/82A)                             | Biolegend      | Cat#333812      |
| Brilliant Violet 711™ anti-human CD11b Antibody (clone: ICRF44)                       | Biolegend      | Cat#301344      |
| Brilliant Violet 605™ anti-human CD163 Antibody (clone: GHI/61)                       | Biolegend      | Cat#333616      |
| Fixable Viability Dye eFluor™ 780                                                     | eBiosciences   | Cat#65-0865-14  |
| Alexa Fluor® 700 anti-human CD45 Antibody (clone: 2D1)                                | Biolegend      | Cat#368514      |
| PE Mouse Anti-Human CD11c (clone: B-ly6)                                              | BD Biosciences | Cat#560999      |
| BV510 Mouse Anti-Human CD11c (clone: B-ly6)                                           | BD Horizon     | Cat#563026      |
| APC anti-human CD169 (Sialoadhesin, Siglec-1) Antibody (clone: 7-239)                 | Biolegend      | Cat#346008      |
| PE/Dazzle™ 594 anti-human CX3CR1 Antibody (clone: 2A9-1)                              | Biolegend      | Cat#341624      |
| BV786 Mouse Anti-Human HLA-DR (clone: G46-6)                                          | BD Biosciences | Cat#564041      |
| Brilliant Violet 650™ anti-human CD80 Antibody (clone: 2D10)                          | Biolegend      | Cat#305227      |
| Brilliant Violet 650™ anti-human CD86 Antibody (clone: IT2.2)                         | Biolegend      | Cat#305428      |
| Brilliant Violet 421™ anti-human CD209 (DC-SIGN) Antibody (clone: 9E9A8)              | Biolegend      | Cat#330117      |
| Human TruStain FcX™ (Fc Receptor Blocking Solution)                                   | Biolegend      | Cat#422302      |
| APC Mouse Anti-Human CD8                                                              | BD Biosciences | Cat#555369      |
| Brilliant Violet 421™ anti-human CD19 Antibody (clone: SJ25C1)                        | Biolegend      | Cat#363017      |
| Brilliant Violet 421™ anti-human Ki-67 Antibody (clone: Ki-67)                        | Biolegend      | Cat#350506      |
| CD20 Monoclonal Antibody, Alexa Fluor 488 (clone: L26)                                | eBiosciences   | Cat#53-0202-82  |
| Alexa Fluor® 594 anti-Podoplanin/Lymphatic Endothelial Marker Antibody (clone: D2-40) | Biolegend      | Cat#916608      |
| Biotin anti-human CD3 Antibody (clone: HIT3A)                                         | Biolegend      | Cat#300304      |
| PE/Cyanine7 anti-human CD64 Antibody (clone: 10.1)                                    | Biolegend      | Cat#305022      |
| Brilliant Violet 421 Mouse anti-human TNF-a Antibody (clone: MAb11)                   | BD Biosciences | Cat#566275      |
| Brilliant Violet 421 Mouse gG1, k Isotype (clone: X40)                                | BD Biosciences | Cat#562438      |
| Brilliant Violet 421™ Rat IgG1, κ Isotype Ctrl Antibody                               | Biolegend      | Cat#400429      |
| Brilliant Violet 421™ Donkey anti-rabbit IgG (minimal x-reactivity) Antibody          | Biolegend      | Cat#406410      |
| IFN alpha Polyclonal Antibody                                                         | Thermo Fisher  | Cat#PA5-115430  |
| ARG1 Polyclonal Antibody                                                              | Thermo Fisher  | Cat# 16001-1-AP |

**Supplementary Table 3: List of chemicals and commercial kits.**

| <b>Chemicals and Commercial kits</b>                                |                     |                  |
|---------------------------------------------------------------------|---------------------|------------------|
| RPMI 1640                                                           | Fisher scientific   | Cat#MT15040CM    |
| Percoll PLUS                                                        | Sigma-aldrich       | Cat#17-5445-01   |
| DPBS                                                                | Corning             | Cat#20-030-CV    |
| EDTA                                                                | Corning             | Cat#46-034-CI    |
| Tween 20                                                            | Sigma               | Cat#11332465001  |
| Triton X-100                                                        | Sigma               | Cat#93443-500ML  |
| 16% Paraformaldehyde                                                | Fisher              | Cat#50-980-487   |
| Sodium Periodate                                                    | Sigma               | Cat#311448-5G    |
| Shandon Immu-Mount                                                  | Fisher scientific   | Cat#9990402      |
| Normal Goat Serum                                                   | Sigma               | Cat#NS02L-1ML    |
| Disodium Phosphate (Na <sub>2</sub> HPO <sub>4</sub> )              | Sigma               | Cat#255793-50G   |
| Monosodium Phosphate (H <sub>2</sub> NaO <sub>4</sub> P)            | Sigma               | Cat#S5011-500G   |
| L-Lysine HCl                                                        | Sigma               | Cat#L5626-500G   |
| Sucrose                                                             | Sigma               | Cat# s9378-500g  |
| Foxp3 / Transcription Factor Staining Buffer Kit                    | TONBO Biosciences   | Cat#TNB-0607-KIT |
| EasySep™ Human Biotin Positive Selection Kit II                     | StemCell Technology | Cat#17663        |
| Phorbol 12-myristate 13-acetate                                     | Sigma               | Cat# P8139-5MG   |
| Fine particulate matter                                             | Sigma               | Cat# NIST2786    |
| pHrodo™ Red <i>E. coli</i> BioParticles™ Conjugate for Phagocytosis | Thermo Fisher       | Cat# P35361      |
| Live Cell Imaging Solution                                          | Thermo Fisher       | Cat# A14291DJ    |
| Corning™ Penicillin-Streptomycin-L-Glutamine                        | Fisher scientific   | Cat# MT30009CI   |
